# Supplementary material
Source: Elsevier journal article supplement (https://www.sciencedirect.com/science/article/pii/S2173572722002053)
Supplement: mmc1 [file S2173572722002053:mmc1.docx]

**Supplementary Material**

**Long-term survival after acute decompensated pulmonary hypertension: a propensity-score matched study**

Marcos Vinicius Fernandes Garcia, M.D.1 (0000-0003-4730-3650)

Rogerio Souza, M.D., Ph.D.1 (0000-0003-2789-9143)

Pedro Caruso, M.D., Ph.D.1,2 (0000-0002-1051-8458)

Author affiliations

1 Divisao de Pneumologia, Instituto do Coracao, Hospital das Clínicas HCFMUSP, Faculdade de Medicina da Universidade de Sao Paulo, Sao Paulo, Brazil.

2 Intensive Care Unit, AC Camargo Cancer Center, São Paulo, Brazil.

**Methods**

The simplified version of the risk assessment strategy proposed by the ESC/ERS PH guidelines, using the following variables: NYHA-FC, BNP, 6MWT, right atrial pressure (RAP) or cardiac index (CI). In this version of ESC/ERS risk assessment each variable was evaluated for the presence of low, intermediate or high-risk criteria and overall risk category was determined by computing the mean of the risk grades from available variables for each patient and rounding to the nearest integer.

**Results**

**Figure S1**: Boxplots showing the overlapping of the estimated propensity score between ICU and no ICU matched patients.


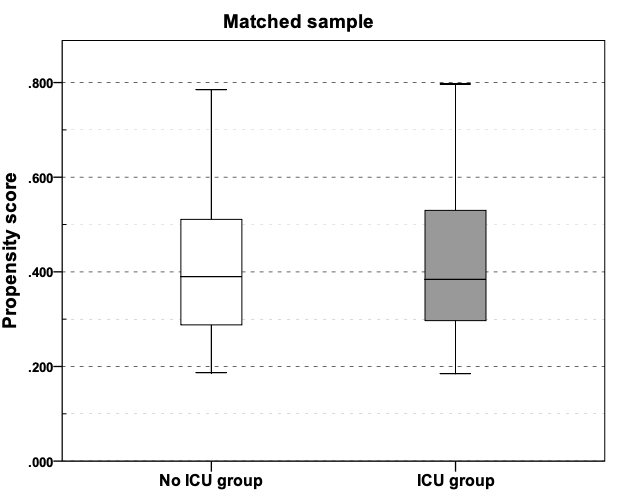


**Table S1:** Additional characteristics of patients that required ICU admission compared to patients with no previous ICU admission, for unmatched and matched samples during the study period.

|  | **Unmatched sample** | | | **Matched sample** | | |
| --- | --- | --- | --- | --- | --- | --- |
|  | **ICU admission (n=46)** | **No ICU admission**  **(n=62)** | ***P*** | **ICU admission (n=33)** | **No ICU admission**  **(n=33)** | ***P*** |
| Median PAP (mmHg) | 50 (48–66) | 57 (44–64) | 0.09 | 51 (48–66) | 56 (46–65) | 0.56 |
| PVR (Woods) | 11.6 (8.7–17.0) | 9.8 (6.2–13.3) | 0.10 | 11.7 (8.7–17.0) | 9.9 (7.6–14.3) | 0.08 |
| PAOP (mmHg) | 10 (7–12) | 12 (10–15) | 0.09 | 10 (7–12) | 12 (10–15) | 0.08 |
| RAP (mmHg) | 12 (6–18) | 10 (7–13) | 0.17 | 12 (5–18) | 12 (8–15) | 0.98 |
| Cardiac output (L/min) | 3.7 (2.8–4.4) | 4.2 (3.4–4.6) | 0.08 | 3.8 (2.8–4.4) | 4.1 (3.1–4.6) | 0.28 |

Categorical and continuous data are presented as frequencies (percentages) and median (25–75% interquartile range), respectively. ICU: intensive care unit, RHC: right heart catheterization, PAP: pulmonary artery pressure, PVR: pulmonary vascular resistance, PAOP: pulmonary artery occlusion pressure, RAP: right atrial pressure.

**Table S2:** ICU group patients’ clinical data at ICU admission and during ICU stay

| **Variables at ICU admission** | **ICU Admission Group**  ***Matched Sample***  **(n=33)** |
| --- | --- |
| SOFA | 5 (4-7) |
| SAPS 3 | 47 (40-53) |
| MAP (mmHg) | 72 (70-84) |
| Heart rate (bpm) | 95 (86-115) |
| Creatinine (mg/dL) | 1.25 (0.85-2.03) |
| BNP (pg/mL) | 535 (253-809) |
| Sodium (mEq/L) | 137 (134-139) |
| Arterial lactate (mg/dL) | 15 (11-19) |
| ScvO2 (%) | 61.3 (53.8-68.1) |
| Intravenous furosemide use, n (%) | 31 (94.0) |
| Vasopressors use, n (%) * | 14 (42.4) |
| Dobutamine use, n (%) | 26 (78.7) |
| Nitric oxide use, n (%) | 7 (21.1) |
| Pulmonary artery cateter use, n (%) | 12 (36.3) |
| Invasive MV use, n (%) | 1 (3.0) |
| Renal replacement therapy, n (%) | 3 (9.0) |

Categorical and continuous data are presented as frequencies (percentages) and median (25-75% interquartile range). SOFA: sequential organ failure assessment; SAPS 3: simplified acute physiology score; MAP: mean arterial pressure; BNP: brain natriuretic peptide; ScvO2%: central venous oxygen saturation; MV: mechanical ventilation.

* Vasopressors defined as any use of norepinephrine, vasopressin or epinephrine
